# Supplementary material for: Sign and goal tracker rats process differently the incentive salience of a conditioned stimulus
Source: PLoS One. 2019 Sep 30;14(9):e0223109. doi: 10.1371/journal.pone.0223109 (PMC6768469; doi:10.1371/journal.pone.0223109)
Supplement: S1 File — (PDF) [file pone.0223109.s001.pdf]

**Data of Experiment 1**

| <b>Subject</b> | <b>Lesion</b> | <b>PCA 1</b> | <b>PCA 2</b> | <b>PCA 3</b> | <b>PCA 4</b> |
|----------------|---------------|--------------|--------------|--------------|--------------|
| P01            | mPfc          | 0,1          | -0,5         | 0,8          | 0,6          |
| P02            | mPfc          | 0,1          | 0,1          | -0,6         | -0,4         |
| P03            | mPfc          | -0,2         | 0,0          | 0,0          | -0,9         |
| P04            | mPfc          | 0,0          | 0,0          | -0,7         | -0,9         |
| P05            | mPfc          | -0,5         | -0,3         | -0,8         | -0,7         |
| P06            | mPfc          | 0,0          | 0,0          | 0,0          | 0,3          |
| P07            | mPfc          | 0,7          | 0,4          | -0,2         | -0,5         |
| P08            | mPfc          | 0,5          | 0,0          | 0,1          | 0,2          |
| P09            | mPfc          | 1,0          | -0,3         | -0,6         | -0,1         |
| P10            | mPfc          | 0,0          | 0,0          | 0,0          | 0,0          |
| P11            | mPfc          | 0,0          | 0,3          | -0,9         | -0,9         |
| P12            | mPfc          | -0,1         | -0,1         | -1,0         | -0,7         |
| P13            | mPfc          | -0,3         | -0,8         | -0,7         | -0,9         |
| P14            | mPfc          | -0,8         | -1,0         | -1,0         | 0,0          |
| P15            | mPfc          | 0,0          | 0,0          | 0,0          | 0,0          |
| P16            | mPfc          | 1,0          | -0,6         | -1,0         | -0,9         |
| P17            | mPfc          | 0,5          | 0,5          | -0,9         | -0,8         |
| P18            | mPfc          | 0,2          | 0,0          | -0,7         | -0,6         |
| P19            | mPfc          | 1,0          | 1,0          | 0,1          | -0,7         |
| P20            | mPfc          | 1,0          | 0,0          | -1,0         | -1,0         |
| P21            | mPfc          | 0,0          | -0,5         | -0,2         | -0,2         |
| P22            | mPfc          | -0,7         | -0,6         | -1,0         | -0,7         |
| P23            | mPfc          | -1,0         | 0,0          | -1,0         | -1,0         |
| P24            | mPfc          | 1,0          | 0,2          | 0,0          | -0,1         |
| P25            | mPfc          | -0,8         | 0,0          | -1,0         | -1,0         |
| S01            | Sham          | -1,0         | -1,0         | -0,3         | -0,2         |
| S02            | Sham          | -1,0         | -0,4         | -0,5         | -0,9         |
| S03            | Sham          | -0,2         | -0,9         | -0,2         | -0,9         |
| S04            | Sham          | 1,0          | -0,2         | -0,4         | -0,3         |
| S05            | Sham          | 0,6          | -0,6         | -0,1         | -0,6         |
| S06            | Sham          | 0,3          | 0,4          | -0,2         | -0,2         |
| S07            | Sham          | 0,0          | -0,8         | 0,1          | -0,4         |
| S08            | Sham          | 0,5          | 0,9          | 0,8          | 0,9          |
| S09            | Sham          | -1,0         | -0,7         | 0,8          | 0,6          |
| S10            | Sham          | 0,9          | 1,0          | 0,9          | 0,9          |
| S11            | Sham          | 0,0          | 0,3          | 0,5          | 0,3          |
| S12            | Sham          | -0,6         | 0,2          | 0,5          | 0,6          |
| S13            | Sham          | -1,0         | -0,7         | 0,5          | 0,0          |
| S14            | Sham          | -1,0         | -0,3         | 0,7          | 0,8          |
| S15            | Sham          | -0,2         | -0,1         | 0,7          | 0,5          |
| S16            | Sham          | -0,7         | -0,6         | -0,2         | -0,3         |
| S17            | Sham          | 0,9          | 0,0          | -0,1         | 0,3          |
| S18            | Sham          | 0,3          | -0,8         | -0,5         | -0,7         |
| S19            | Sham          | -0,8         | -0,5         | -0,5         | -0,4         |
| S20            | Sham          | -0,9         | -0,4         | -0,4         | -0,5         |
| S21            | Sham          | -1,0         | -0,7         | -0,4         | -0,8         |
| S22            | Sham          | -1,0         | -0,9         | -0,3         | -0,1         |
| S23            | Sham          | 0,6          | 0,8          | 1,0          | 0,8          |

|     |      |     |     |     |     |
|-----|------|-----|-----|-----|-----|
| S24 | Sham | 0,8 | 0,9 | 1,0 | 0,8 |
| S25 | Sham | 0,9 | 0,7 | 1,0 | 1,0 |

## Data of Experiment 2

| Group           | Phase A |       |       |       | Phase B |      |
|-----------------|---------|-------|-------|-------|---------|------|
|                 | PCA 1   | PCA 2 | PCA 3 | PCA 4 | PCA 1   |      |
| pre-adolescent  | 1,0     | -0,7  | -0,6  | -0,7  |         | -0,5 |
| pre-adolescent  | -0,8    | -0,4  | -1,0  | -1,0  |         | -0,9 |
| pre-adolescent  | -0,6    | -0,4  | -0,1  | -0,1  |         | -0,3 |
| pre-adolescent  | -0,7    | -0,8  | -0,6  | -0,7  |         | -0,4 |
| pre-adolescent  | -0,7    | 0,1   | 0,5   | 0,9   |         | 1,0  |
| pre-adolescent  | 0,4     | 0,4   | 0,4   | 0,7   |         | 0,7  |
| pre-adolescent  | 1,0     | -0,2  | 1,0   | 0,4   |         | -0,4 |
| pre-adolescent  | -0,1    | 0,8   | 1,0   | 0,7   |         | 0,9  |
| pre-adolescent  | -0,6    | -0,2  | -0,1  | 0,4   |         | 0,5  |
| pre-adolescent  | -0,4    | -0,7  | 0,1   | -0,2  |         | 0,3  |
| pre-adolescent  | 0,0     | -0,6  | 0,1   | -0,3  |         | 0,2  |
| pre-adolescent  | -0,3    | 0,7   | 0,1   | 0,0   |         | 0,7  |
| pre-adolescent  | -0,7    | -0,7  | -0,6  | -0,6  |         | -0,7 |
| pre-adolescent  | 0,2     | -0,9  | -1,0  | -0,6  |         | 0,1  |
| pre-adolescent  | -0,9    | -0,5  | -0,7  | -0,8  |         | -0,8 |
| pre-adolescent  | 0,9     | 1,0   | 0,4   | 1,0   |         | 0,8  |
| pre-adolescent  | -0,3    | -0,8  | 0,5   | 0,8   |         | 0,8  |
| pre-adolescent  | 1,0     | 0,6   | 1,0   | 1,0   |         | 1,0  |
| pre-adolescent  | 0,8     | 1,0   | 0,9   | 1,0   |         | 1,0  |
| pre-adolescent  | 0,0     | 0,5   | 1,0   | 0,9   |         | 1,0  |
| pre-adolescent  | 0,3     | 0,2   | 1,0   | 0,7   |         | 0,5  |
| pre-adolescent  | -1,0    | -0,6  | 1,0   | 0,9   |         | 0,7  |
| pre-adolescent  | 0,0     | 0,4   | 0,6   | 0,8   |         | 0,7  |
| pre-adolescent  | -0,9    | 0,1   | 0,8   | 0,9   |         | 0,8  |
| pre-adolescent  | 1,0     | 1,0   | 0,2   | 1,0   |         | -1,0 |
| pre-adolescent  | 1,0     | 0,2   | 0,9   | 1,0   |         | -0,9 |
| pre-adolescent  | 0,4     | -0,2  | -0,7  | -0,5  |         | -0,6 |
| pre-adolescent  | 0,1     | 0,6   | 0,8   | 0,1   |         | -0,3 |
| pre-adolescent  | -0,9    | 0,1   | 0,2   | 0,2   |         | -0,3 |
| pre-adolescent  | 0,1     | -0,4  | -0,5  | 0,3   |         | -0,1 |
| pre-adolescent  | -0,2    | -0,5  | 1,0   | -0,2  |         | 0,0  |
| pre-adolescent  | -0,1    | 0,2   | 1,0   | 0,3   |         | 0,9  |
| pre-adolescent  | 0,9     | 0,5   | 0,1   | -0,5  |         | 0,7  |
|                 |         |       |       |       |         |      |
| Late adolescent | -1,0    | -0,4  | -0,9  | -0,5  |         | -0,8 |
| Late adolescent | -0,2    | -0,9  | -0,9  | -0,2  |         | 1,0  |
| Late adolescent | 0,6     | -0,6  | -0,6  | -0,1  |         | 0,5  |
| Late adolescent | 0,3     | -0,8  | -0,7  | -0,5  |         | 0,4  |
| Late adolescent | -0,8    | -0,5  | -0,4  | -0,5  |         | -0,2 |
| Late adolescent | -1,0    | -0,7  | -0,8  | -0,4  |         | 0,5  |
| Late adolescent | -0,4    | 0,0   | 0,0   | -1,0  |         | -0,2 |
| Late adolescent | 0,5     | 0,9   | 0,9   | 0,8   |         | 0,5  |
| Late adolescent | -1,0    | -0,7  | 0,6   | 0,8   |         | 0,7  |
| Late adolescent | 0,9     | 1,0   | 0,9   | 0,9   |         | 0,9  |
| Late adolescent | 0,0     | 0,3   | 0,3   | 0,5   |         | 0,9  |

|                 |      |      |      |      |      |
|-----------------|------|------|------|------|------|
| Late adolescent | -1,0 | -0,7 | 0,0  | 0,5  | 0,7  |
| Late adolescent | -1,0 | -0,3 | 0,8  | 0,7  | 0,8  |
| Late adolescent | -0,2 | -0,1 | 0,5  | 0,7  | 0,4  |
| Late adolescent | 0,6  | 0,8  | 0,8  | 1,0  | 0,9  |
| Late adolescent | 0,8  | 0,9  | 0,8  | 1,0  | 0,9  |
| Late adolescent | 0,9  | 0,6  | 1,0  | 1,0  | 1,0  |
| Late adolescent | -0,8 | 0,5  | 0,9  | 1,0  | 1,0  |
| Late adolescent | 0,4  | 0,6  | 0,9  | 1,0  | 0,8  |
| Late adolescent | 0,4  | 0,6  | 1,0  | 0,9  | 0,9  |
| Late adolescent | 0,3  | 0,8  | 0,4  | 1,0  | 0,2  |
| Late adolescent | 0,2  | 1,0  | 0,7  | 1,0  | 1,0  |
| Late adolescent | 0,1  | 0,8  | 0,7  | 0,9  | 0,9  |
| Late adolescent | 0,7  | 0,8  | 1,0  | 0,6  | 1,0  |
| Late adolescent | -0,5 | 0,9  | 0,1  | 1,0  | 0,7  |
| Late adolescent | -1,0 | -1,0 |      | 0,6  | 0,9  |
| Late adolescent | -1,0 | -1,0 | -0,2 | -0,3 | 0,0  |
| Late adolescent | 1,0  | -0,2 | -0,3 | -0,4 | 0,8  |
| Late adolescent | 0,3  | 0,4  | -0,2 | -0,2 | 0,3  |
| Late adolescent | 0,0  | -0,8 | -0,4 | 0,1  | 0,5  |
| Late adolescent | -0,6 | 0,2  | 0,6  | 0,5  | 0,5  |
| Late adolescent | -0,7 | -0,6 | -0,3 | -0,2 | 0,8  |
| Late adolescent | 0,9  | 0,0  | 0,3  | -0,1 | 0,4  |
| Late adolescent | -0,9 | -0,4 | -0,5 | -0,4 | -0,4 |
| Late adolescent | -1,0 | -0,9 | -0,1 | -0,3 | 0,0  |
| Late adolescent | 0,6  | 0,3  | 0,5  | 0,4  | 0,5  |
| Late adolescent | 0,9  | -1,0 | -0,9 | -0,1 | 0,5  |
| Late adolescent | 0,0  | 0,1  | 0,5  | 0,5  | 0,3  |
| Late adolescent | 0,9  | 0,7  | 0,7  | 0,3  | 0,8  |

|       |       |       |  | Phase A' |       |       |       |
|-------|-------|-------|--|----------|-------|-------|-------|
| PCA 2 | PCA 3 | PCA 4 |  | PCA 1    | PCA 2 | PCA 3 | PCA 4 |
| -0,7  | 0,9   | 1,0   |  | 0,9      | 1,0   | 1,0   | 1,0   |
| -1,0  | -1,0  | -0,6  |  | -0,6     | -0,3  | -0,1  | -0,5  |
| 0,9   | 1,0   | 1,0   |  | 0,9      | 1,0   | 1,0   | 1,0   |
| -0,6  | 0,9   | 0,9   |  | 0,7      | 0,7   | 0,9   | 0,7   |
| 0,9   | 0,9   | 0,9   |  | 0,9      | 0,9   | 0,7   | 0,7   |
| 1,0   | 1,0   | 1,0   |  | 1,0      | 1,0   | 1,0   | 1,0   |
| 0,6   | 1,0   | 1,0   |  | 0,9      | 1,0   | 1,0   | 1,0   |
| 1,0   | 1,0   | 1,0   |  | 1,0      | 1,0   | 0,9   | 0,9   |
| 0,7   | 0,7   | 0,4   |  | 0,4      | 0,7   | 0,7   | 0,5   |
| 1,0   | 1,0   | 1,0   |  | 1,0      | 1,0   | 1,0   | 1,0   |
| 0,9   | 1,0   | 1,0   |  | 1,0      | 1,0   | 1,0   | 1,0   |
| 0,9   | 1,0   | 1,0   |  | 0,9      | 1,0   | 1,0   | 0,7   |
| -0,7  | -0,9  | -0,8  |  | -0,6     | -0,4  | -0,4  | -0,3  |
| 0,2   | 0,4   | 0,4   |  | 0,0      | 0,3   | 0,2   | 0,3   |
| -0,2  | 0,3   | 0,9   |  | 0,7      | 0,5   | 0,6   | 0,4   |
| 0,9   | 1,0   | 1,0   |  | 1,0      | 1,0   | 1,0   | 1,0   |
| 1,0   | 1,0   | 1,0   |  | 1,0      | 1,0   | 1,0   | 1,0   |
| 1,0   | 1,0   | 1,0   |  | 1,0      | 1,0   | 1,0   | 0,9   |
| 1,0   | 0,9   | 1,0   |  | 1,0      | 1,0   | 1,0   | 1,0   |
| 1,0   | 0,9   | 1,0   |  | 1,0      | 0,9   | 1,0   | 0,9   |
| 0,5   | 0,2   | 0,2   |  | 0,8      | 0,0   | -0,1  | -0,1  |
| 0,8   | 0,5   | 0,8   |  | 1,0      | 1,0   | 0,9   | 1,0   |
| 0,9   | 1,0   | 1,0   |  | 1,0      | 1,0   | 1,0   | 0,9   |
| 1,0   | 1,0   | 1,0   |  | 1,0      | 1,0   | 1,0   | 1,0   |
| -1,0  | -0,7  | 1,0   |  | 0,4      | 1,0   | 0,6   | 0,9   |
| -1,0  | -1,0  | -1,0  |  | -0,9     | -0,9  | -0,8  | -1,0  |
| 0,6   | 1,0   | 1,0   |  | 0,6      | 1,0   | 1,0   | 1,0   |
| -0,2  | 0,8   | 0,4   |  | 1,0      | 1,0   | 1,0   | 1,0   |
| 0,2   | 0,8   | 1,0   |  | 0,5      | 0,7   | 0,7   | 0,7   |
| 0,9   | 1,0   | 1,0   |  | 1,0      | 0,9   | 1,0   | 0,9   |
| 0,8   | 0,9   | 1,0   |  | 0,8      | 0,9   | 0,9   | 0,9   |
| 0,9   | 0,9   | 0,9   |  | 0,8      | 0,9   | 1,0   | 1,0   |
| 0,2   | 0,5   | 0,9   |  | 0,9      | 0,9   | 0,9   | 0,5   |
|       |       |       |  |          |       |       |       |
| 0,3   | 0,9   | 1,0   |  | 1,0      | 1,0   | 1,0   | 1,0   |
| 1,0   | 1,0   | 1,0   |  | 0,9      | 1,0   | 1,0   | 0,9   |
| 0,7   | 0,8   | 0,9   |  | 0,9      | 0,9   | 1,0   | 0,9   |
| 0,8   | 0,8   | 0,4   |  | 0,7      | 0,5   | 0,7   | 0,8   |
| 0,3   | 0,6   | 0,1   |  | 0,2      | -0,1  | -0,3  | -0,2  |
| 0,6   | 0,9   | 1,0   |  | 0,5      | 0,7   | 0,9   | 0,9   |
| 0,8   | 1,0   | 1,0   |  | 1,0      | 1,0   | 1,0   | 1,0   |
| 0,8   | 0,9   | 0,7   |  | 0,8      | 0,9   | 0,7   | 0,5   |
| 1,0   | 0,9   | 1,0   |  | 1,0      | 0,8   | 0,9   | 1,0   |
| 1,0   | 1,0   | 1,0   |  | 0,9      | 1,0   | 1,0   | 1,0   |
| 0,7   | 0,9   | 1,0   |  | 1,0      | 1,0   | 1,0   | 1,0   |

|      |      |      |     |      |      |      |
|------|------|------|-----|------|------|------|
| 1,0  | 1,0  | 0,9  | 1,0 | 1,0  | 0,9  | 0,9  |
| 1,0  | 1,0  | 1,0  | 0,9 | 1,0  | 0,9  | 0,9  |
| 0,2  | 0,5  | 0,8  | 0,7 | 0,9  | 0,8  | 1,0  |
| 1,0  | 1,0  | 1,0  | 1,0 | 0,9  | 1,0  | 1,0  |
| 0,9  | 1,0  | 1,0  | 1,0 | 1,0  | 1,0  | 1,0  |
| 1,0  | 0,9  | 1,0  | 0,9 | 1,0  | 1,0  | 1,0  |
| 1,0  | 1,0  | 1,0  | 1,0 | 1,0  | 0,9  | 0,8  |
| 1,0  | 1,0  | 1,0  | 1,0 | 1,0  | 1,0  | 1,0  |
| 1,0  | 1,0  | 1,0  | 0,9 | 0,9  | 1,0  | 1,0  |
| 0,8  | 1,0  | 1,0  | 1,0 | 1,0  | 1,0  | 1,0  |
| 1,0  | 1,0  | 1,0  | 0,9 | 1,0  | 0,9  | 0,8  |
| 1,0  | 0,9  | 1,0  | 1,0 | 1,0  | 0,9  | 0,9  |
| 1,0  | 1,0  | 1,0  | 1,0 | 1,0  | 1,0  | 1,0  |
| 0,9  | -0,7 | 0,9  | 0,9 | 0,7  | 0,8  | 1,0  |
| 1,0  | 1,0  | 1,0  | 1,0 | 0,9  | 1,0  | 1,0  |
| 0,2  | 0,0  | 0,6  | 0,9 | 0,9  | 1,0  | 0,8  |
| 1,0  | 1,0  | 1,0  | 0,2 | 1,0  | 1,0  | 1,0  |
| 0,5  | 0,5  | 0,5  | 1,0 | 0,5  | 0,3  | 0,9  |
| 0,9  | 1,0  | 1,0  | 1,0 | 1,0  | 1,0  | 1,0  |
| 0,8  | 1,0  | 1,0  | 1,0 | 1,0  | 1,0  | 1,0  |
| 1,0  | 1,0  | 1,0  | 0,8 | 1,0  | 1,0  | 1,0  |
| 0,8  | 0,9  | 0,9  | 0,1 | 0,6  | 0,7  | 0,8  |
| -0,2 | 0,1  | 0,2  | 1,0 | -0,1 | -0,4 | -0,4 |
| 0,8  | 0,9  | 1,0  | 0,9 | 0,9  | 1,0  | 1,0  |
| 0,9  | 1,0  | 1,0  | 0,8 | 0,9  | 1,0  | 1,0  |
| 0,9  | 1,0  | 1,0  | 0,3 | 0,9  | 0,9  | 1,0  |
| 0,6  | -0,1 | -0,3 | 1,0 | 0,2  | 0,1  | -0,2 |
| 1,0  | 1,0  | 1,0  |     | 1,0  | 0,9  | 0,9  |

### Data of Experiment 3

| Phenotype    | Preexposure   | % Freezing          |                    |
|--------------|---------------|---------------------|--------------------|
|              |               | before conditioning | after conditioning |
| Goal Tracker | No preexposed | 95,6                | 87,3               |
| Goal Tracker | No preexposed | 92,8                | 82,9               |
| Goal Tracker | No preexposed | 91,4                | 82,8               |
| Goal Tracker | No preexposed | 89,3                | 85,9               |
| Goal Tracker | No preexposed | 65,3                | 70,5               |
| Goal Tracker | No preexposed | 60,2                | 68,4               |
| Goal Tracker | No preexposed | 51,4                | 74,2               |
| Goal Tracker | No preexposed | 48,9                | 68,3               |
| Goal Tracker | No preexposed | 22,2                | 79,4               |
| Goal Tracker | No preexposed | 21,1                | 91,2               |
| Goal Tracker | No preexposed | 20,3                | 88,4               |
| Goal Tracker | No preexposed | 18,1                | 78,4               |
| Goal Tracker | No preexposed | 7,3                 | 68,8               |
| Goal Tracker | No preexposed | 0,5                 | 74,0               |
|              |               |                     |                    |
| Goal Tracker | Exposed       | 66,8                | 13,5               |
| Goal Tracker | Exposed       | 64,3                | 11,6               |
| Goal Tracker | Exposed       | 61,4                | 20,1               |
| Goal Tracker | Exposed       | 57,9                | 12,5               |
| Goal Tracker | Exposed       | 49,7                | 6,2                |
| Goal Tracker | Exposed       | 49,5                | 92,5               |
| Goal Tracker | Exposed       | 47,4                | 6,1                |
| Goal Tracker | Exposed       | 44,7                | 88,4               |
| Goal Tracker | Exposed       | 44,0                | 26,1               |
| Goal Tracker | Exposed       | 43,9                | 30,1               |
| Goal Tracker | Exposed       | 22,3                | 92,1               |
| Goal Tracker | Exposed       | 18,9                | 96,9               |
|              |               |                     |                    |
| Sign Tracker | No preexposed | 64,6                | 91,9               |
| Sign Tracker | No preexposed | 88,2                | 62,7               |
| Sign Tracker | No preexposed | 67,4                | 70,0               |
| Sign Tracker | No preexposed | 62,4                | 66,4               |
| Sign Tracker | No preexposed | 60,3                | 68,1               |
| Sign Tracker | No preexposed | 57,7                | 58,4               |
| Sign Tracker | No preexposed | 51,8                | 74,0               |
| Sign Tracker | No preexposed | 30,8                | 50,9               |
| Sign Tracker | No preexposed | 49,6                | 69,4               |
| Sign Tracker | No preexposed | 43,6                | 32,2               |
| Sign Tracker | No preexposed | 27,6                | 62,9               |
| Sign Tracker | No preexposed | 22,3                | 55,1               |
| Sign Tracker | No preexposed | 11,6                | 74,8               |
| Sign Tracker | No preexposed | 4,7                 | 75,5               |
|              |               |                     |                    |
| Sign Tracker | Exposed       | 55,5                | 60,8               |
| Sign Tracker | Exposed       | 49,6                | 55,9               |
| Sign Tracker | Exposed       | 22,2                | 45,4               |
| Sign Tracker | Exposed       | 39,0                | 57,2               |

|              |         |      |      |
|--------------|---------|------|------|
| Sign Tracker | Exposed | 37,1 | 25,1 |
| Sign Tracker | Exposed | 36,6 | 52,9 |
| Sign Tracker | Exposed | 35,1 | 54,1 |
| Sign Tracker | Exposed | 29,7 | 49,1 |
| Sign Tracker | Exposed | 27,5 | 36,5 |
| Sign Tracker | Exposed | 25,8 | 32,6 |
| Sign Tracker | Exposed | 8,2  | 70,2 |
| Sign Tracker | Exposed | 7,3  | 38,9 |
| Sign Tracker | Exposed | 3,8  | 74,8 |
| Sign Tracker | Exposed | 0,4  | 36,6 |
